# Supplementary material for: Spline Interpolation on Compact Riemannian Manifolds
Source: Research Square preprint supplement (doi:10.21203/rs.3.rs-7818894/v1), 2025-10-27
Supplement: Supplementary file 1 [file d0447af660c3cdf6d5a74518.pdf]

# Supplementary Material: Spline Interpolation on Compact Riemannian Manifolds

Charlie Sire<sup>1\*</sup>, Mike Pereira<sup>1</sup> and Thomas Romary<sup>1</sup>

<sup>1\*</sup>Centre for geosciences and geoengineering, Mines Paris, PSL University, Fontainebleau, 77300, France.

\*Corresponding author(s). E-mail(s): [charlie.sire@minesparis.psl.eu](mailto:charlie.sire@minesparis.psl.eu);  
Contributing authors: [mike.pereira@minesparis.psl.eu](mailto:mike.pereira@minesparis.psl.eu);  
[thomas.romary@minesparis.psl.eu](mailto:thomas.romary@minesparis.psl.eu).

## Abstract

This document presents the computation of the mass and stiffness matrices for **2**-manifolds in  $\mathbb{R}^3$ , using natural local coordinate charts such as cylindrical or spherical coordinates.

## 1 Introduction and notations

Here, we aim to detail the computation of

$$M_{ii} = \langle \psi_i, 1 \rangle_{L^2(\mathcal{M})}, \quad F_{ij} = \langle \nabla \psi_i, \nabla \psi_j \rangle_{L^2(\mathcal{M})},$$

which are the entries of the mass matrix (with mass lumping) and the stiffness matrix, respectively. Here, we focus on the case of 2-dimensional manifolds embedded in  $\mathbb{R}^3$ , which is the situation detailed in the article. Anisotropies are taken into account in the local coordinates of the manifold  $(\mathcal{M}, g)$ , for instance using cylindrical coordinates  $(\theta, z)$  for a cylinder, or spherical coordinates  $(\theta, \phi)$  for a sphere.

The manifold is triangulated, and for each triangle we introduce the following associated shapes, illustrated in Figure 1:

- the curved triangle  $\mathcal{T}$  on the manifold,
- the polyhedral approximation  $T$ , which is a flat triangle embedded in  $\mathbb{R}^3$ ,
- the reference triangle  $T_0 \subset \mathbb{R}^2$ , whose corner points are  $(1, 0)$ ,  $(0, 1)$ , and  $(0, 0)$ .

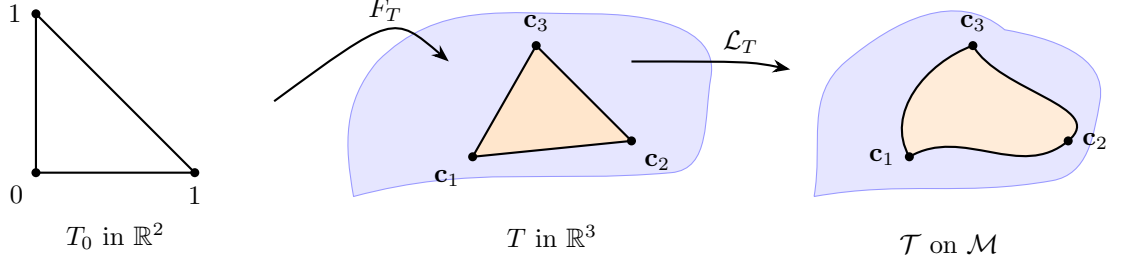

**Fig. 1** The three representations of a triangle: the reference triangle  $T_0$ , the flat triangle  $T \subset \mathbb{R}^3$ , and the curved triangle  $\mathcal{T} \subset \mathcal{M}$ . The mappings  $F_T$  and  $L_T$  connect them.

These shapes are connected by the following functions

- The function  $F_T : T_0 \rightarrow T$ , which maps a point with barycentric coordinates in  $T_0$  to the corresponding point in the flat triangle  $T$ .
- The function  $L_T : T \rightarrow \mathcal{T}$ , which maps a point in the flat triangle  $T$  to the corresponding point in the curved triangle  $\mathcal{T} \subset \mathcal{M}$ .

Let  $\mathcal{T}$  denote the set of all triangles  $\mathcal{T}$ . For a node  $\mathbf{c}_j$ , we define

$$\mathcal{T}^{(j)} = \{\mathcal{T} \in \mathcal{T} : \mathbf{c}_j \text{ is one of the vertices of } \mathcal{T}\}.$$

Consider a triangle  $\mathcal{T}$  with vertices  $\mathbf{c}_{j_1}, \mathbf{c}_{j_2}, \mathbf{c}_{j_3}$ , where  $(j_1, j_2, j_3) \in \{1, \dots, m\}^3$ . We denote by  $1 \leq k_j \leq 3$  the index such that  $j = j_{k_j}$ . For instance, if  $j_1 = 12$ , then  $k_{12} = 1$ .

With these notations, the affine mapping from the reference triangle  $T_0$  to  $\mathcal{T}$  is

$$F_T(y_1, y_2) = \mathbf{c}_{j_3} + M_T \begin{pmatrix} y_1 \\ y_2 \end{pmatrix}, \quad M_T = (\mathbf{c}_{j_1} - \mathbf{c}_{j_3}, \mathbf{c}_{j_2} - \mathbf{c}_{j_3}) \in \mathbb{R}^{3 \times 2} \quad (1)$$

Moreover, for  $j \in \{j_1, j_2, j_3\}$ , the restriction of the basis function  $\psi_j$  to  $\mathcal{T}$  is

$$\psi_{j|\mathcal{T}} = p_0^{(k_j)} \circ F_T^{-1} \circ L_T^{-1}, \quad (2)$$

where  $p_0^{(k)}$  is the standard basis polynomial on  $T_0$  which takes value 1 at vertex  $k$ :

$$p_0^{(k)}(y_1, y_2) = \begin{cases} y_k, & \text{if } k \in \{1, 2\}, \\ 1 - y_1 - y_2, & \text{if } k = 3. \end{cases}$$

## 2 Computation of the integrals

For a given curved triangle  $\mathcal{T}$ , we define  $x_{\mathcal{T}} = F_T^{-1} \circ L_T^{-1}$  that associates a point in  $\mathcal{T}$  to the barycentric coordinates in  $T_0$ . Then,  $(\mathcal{T}, x_{\mathcal{T}})$  defines a coordinates chart.

The integral of a function  $f$  over  $\mathcal{M}$  can be split into a sum of integrals over each triangle  $\mathcal{T}$  :

$$\int_{\mathcal{M}} f d\mu_g = \sum_{\mathcal{T} \in \mathcal{T}} \int_{\mathcal{T}} f d\mu_g = \sum_{\mathcal{T} \in \mathcal{T}} \int_{T_0} f \circ L_{\mathcal{T}} \circ F_{\mathcal{T}}(\mathbf{y}) |\mathbf{G}^{x_{\mathcal{T}}}(L_{\mathcal{T}} \circ F_{\mathcal{T}}(\mathbf{y}))|^{\frac{1}{2}} d\mathbf{y},$$

where  $\mathbf{G}^{x_{\mathcal{T}}}(\cdot)$  is the matrix tensor at a given point of  $\mathcal{M}$  expressed in the coordinate chart  $(\mathcal{T}, x)$ .

In practice, the matrix tensor  $\mathbf{G}^{x_{\mathcal{T}}}$  is assumed to be constant across each triangle:

$$\forall \mathcal{T} \in \mathcal{T}, \forall \mathbf{s} \in \mathcal{T}, \mathbf{G}^{x_{\mathcal{T}}}(\mathbf{s}) = \mathbf{G}_{\mathcal{T}}.$$

## 2.1 Computation of $M_{ii}$

$$\begin{aligned} M_{ii} &= \sum_{\mathcal{T} \in \mathcal{T}^{(i)}} \int_{T_0} \psi_i \circ L_{\mathcal{T}} \circ F_{\mathcal{T}}(\mathbf{y}) |\mathbf{G}^{x_{\mathcal{T}}}(L_{\mathcal{T}} \circ F_{\mathcal{T}}(\mathbf{y}))|^{\frac{1}{2}} d\mathbf{y} \\ &= \sum_{\mathcal{T} \in \mathcal{T}^{(i)}} \int_{T_0} p_0^{(k_i)} |\mathbf{G}^{x_{\mathcal{T}}}(L_{\mathcal{T}} \circ F_{\mathcal{T}}(\mathbf{y}))|^{\frac{1}{2}} d\mathbf{y} \\ &= \sum_{\mathcal{T} \in \mathcal{T}^{(i)}} |\mathbf{G}_{\mathcal{T}}|^{\frac{1}{2}} \int_{T_0} p_0^{(k_j)} d\mathbf{y} \\ &= \sum_{\mathcal{T} \in \mathcal{T}^{(i)}} \frac{|\mathbf{G}_{\mathcal{T}}|^{\frac{1}{2}}}{6} \end{aligned}$$

## 2.2 Computation of $F_{ij}$

$$F_{ij} = \sum_{\mathcal{T} \in \mathcal{T}^{(i)}} \int_{\mathcal{T}} (\nabla_{x_{\mathcal{T}}} \psi_i(\mathbf{s}))^{\top} [\mathbf{G}^{x_{\mathcal{T}}}(\mathbf{s})]^{-1} \nabla_{x_{\mathcal{T}}} \psi_j(\mathbf{s}) d\mu_g,$$

where the gradient with respect to the coordinates  $(\mathcal{T}, x_{\mathcal{T}})$  is given by

$$\nabla_{x_{\mathcal{T}}} \psi_i(\mathbf{s}) = \boldsymbol{\omega}_{k_i},$$

with  $\boldsymbol{\omega}_k$  the  $k$ -th canonical vector of  $\mathbb{R}^2$  for  $k \in \{1, 2\}$ , and  $\boldsymbol{\omega}_3 = -\boldsymbol{\omega}_1 - \boldsymbol{\omega}_2$ .

Then,

$$\begin{aligned} F_{ij} &= \sum_{\mathcal{T} \in \mathcal{T}^{(i)}} \int_{\mathcal{T}} \boldsymbol{\omega}_{k_i}^{\top} [\mathbf{G}^{x_{\mathcal{T}}}(\mathbf{s})]^{-1} \boldsymbol{\omega}_{k_j} d\mu_g \\ &= \sum_{\mathcal{T} \in \mathcal{T}^{(i)}} \boldsymbol{\omega}_{k_i}^{\top} [\mathbf{G}_{\mathcal{T}}]^{-1} \boldsymbol{\omega}_{k_j} \int_{T_0} |\mathbf{G}^{x_{\mathcal{T}}}(L_{\mathcal{T}} \circ F_{\mathcal{T}}(\mathbf{y}))|^{\frac{1}{2}} d\mathbf{y} \\ &= \sum_{\mathcal{T} \in \mathcal{T}^{(i)}} \frac{1}{2} \boldsymbol{\omega}_{k_i}^{\top} [\mathbf{G}_{\mathcal{T}}]^{-1} \boldsymbol{\omega}_{k_j} |\mathbf{G}_{\mathcal{T}}|^{\frac{1}{2}} \end{aligned}$$

### 3 Matrix tensor defined in the natural local coordinates charts

The objective here is to define  $\mathbf{G}^{x\tau}(\mathbf{s})$  from a representative matrix  $\mathbf{G}^y$  expressed in another coordinate chart  $(\mathcal{T}, y)$ .

Here,  $y$  denotes spherical coordinates in the case of the sphere, or cylindrical coordinates when studying a cylinder, thus providing interpretable representative matrices  $\mathbf{G}^y$ .

More generally, we consider  $y$  of the form

$$y = \Psi \circ \Phi,$$

where  $\Phi$  is the natural injection into  $\mathbb{R}^3$ , and  $\Psi : \mathbb{R}^3 \rightarrow \mathbb{R}^2$  represents the change of coordinates (for instance, from Cartesian coordinates in  $\mathbb{R}^3$  to spherical coordinates).

Following [1], we have

$$\mathbf{G}^{x\tau}(\mathbf{s}) = J_{y \circ x_{\mathcal{T}}^{-1}}(x(\mathbf{s}))^\top \mathbf{G}^y(\mathbf{s}) J_{y \circ x_{\mathcal{T}}^{-1}}(x(\mathbf{s})),$$

where  $J_{y \circ x_{\mathcal{T}}^{-1}}(x(\mathbf{s}))$  denotes the Jacobian matrix of  $y \circ x_{\mathcal{T}}^{-1}$  evaluated at  $x(\mathbf{s})$ .

We have

$$\begin{aligned} J_{y \circ x_{\mathcal{T}}^{-1}}(x(\mathbf{s})) &= J_{\Psi \circ \Phi \circ L_T \circ F_T}(x(\mathbf{s})) \\ &= J_{\Psi}(\Phi \circ L_T \circ F_T(x(\mathbf{s}))) J_{\Phi \circ L_T}(F_T(x(\mathbf{s}))) J_{F_T}(x(\mathbf{s})) \\ &= J_{\Psi}(\Phi(\mathbf{s})) J_{\Phi \circ L_T}(F_T(x(\mathbf{s}))) J_{F_T}(x(\mathbf{s})). \end{aligned}$$

For sufficiently fine triangulations, we can approximate  $\Phi \circ L_T$  by the identity map, i.e.  $\Phi \circ L_T \approx \text{Id}$ . Then in the following we consider

$$J_{y \circ x_{\mathcal{T}}^{-1}}(x(\mathbf{s})) = J_{\Psi}(\Phi(\mathbf{s})) J_{F_T}(x(\mathbf{s})).$$

Then, we obtain

$$\mathbf{G}_{\mathcal{T}} = \mathbf{M}_T^\top J_{\Psi}(T)^\top \mathbf{G}_{\mathcal{T}}^y J_{\Psi}(T) \mathbf{M}_T \quad (3)$$

with  $\mathbf{G}_{\mathcal{T}}^y$  the constant approximation of  $\mathbf{G}^y(\mathbf{s})$  on  $T$ ,  $J_{\Psi}(T)$  the Jacobian matrix of  $\Psi$  evaluated at the barycenter of  $T$ , and  $\mathbf{M}_T$  is the Jacobian of  $F_T$  (see Equation 1).

Typically, the matrix  $\mathbf{G}_{\mathcal{T}}^y$  can be represented as a local deformation of the manifold in the chosen coordinate chart (spherical or cylindrical) by combining a rotation and a diagonal scaling. More precisely,

$$\mathbf{G}_{\mathcal{T}}^y = \mathbf{R}(\theta_{\mathcal{T}}) \begin{pmatrix} \rho_1^{\mathcal{T}} & 0 \\ 0 & \rho_2^{\mathcal{T}} \end{pmatrix}^2 \mathbf{R}(\theta_{\mathcal{T}})^\top,$$

where

$$\mathbf{R}(\theta_{\mathcal{T}}) = \begin{pmatrix} \cos \theta_{\mathcal{T}} & -\sin \theta_{\mathcal{T}} \\ \sin \theta_{\mathcal{T}} & \cos \theta_{\mathcal{T}} \end{pmatrix}$$

is the rotation matrix by an angle  $\theta_{\mathcal{T}}$ , and  $\rho_1^{\mathcal{T}}, \rho_2^{\mathcal{T}} > 0$  are local scaling factors along the principal directions.

### 3.1 Specific case of the sphere

On the sphere, the change of coordinates  $\Psi_1$  is defined as

$$\Psi_1(x, y, z) = (\theta, \phi), \quad \text{with} \quad \theta = \arctan\left(\frac{\sqrt{x^2 + y^2}}{z}\right) + k_{\theta}(z), \quad \phi = \arctan\left(\frac{y}{x}\right) + k_{\phi}(x, y),$$

where  $\theta \in [0, \pi]$  is the polar angle (from the  $z$ -axis),  $\phi \in [0, 2\pi)$  is the azimuthal angle in the  $xy$ -plane,  $k_{\theta}$  and  $k_{\phi}$  are piecewise constant functions to adjust for the correct quadrant.

Then the Jacobian matrix is

$$J_{\Psi_1} = \begin{pmatrix} \frac{xz}{(x^2 + y^2 + z^2)\sqrt{x^2 + y^2}} & \frac{yz}{(x^2 + y^2 + z^2)\sqrt{x^2 + y^2}} & -\frac{\sqrt{x^2 + y^2}}{x^2 + y^2 + z^2} \\ -\frac{y}{x^2 + y^2} & \frac{x}{x^2 + y^2} & 0 \end{pmatrix}.$$

### 3.2 Specific case of the cylinder

The change of coordinates  $\Psi_2$  from 3D Cartesian coordinates to cylindrical coordinates is defined by

$$\Psi_2(x, y, z) = (\theta, z), \quad \theta = \arctan\left(\frac{y}{x}\right) + k_{\theta}(x, y), \quad z = z,$$

where  $\theta \in [0, 2\pi)$  is the azimuthal angle around the cylinder,  $k_{\theta}$  is a piecewise constant function to adjust for the correct quadrant, and  $z$  is the height along the cylinder's axis.

The Jacobian matrix of  $\Psi_2$  is

$$J_{\Psi_2}(x, y, z) = \begin{pmatrix} -\frac{y}{x^2 + y^2} & \frac{x}{x^2 + y^2} & 0 \\ 0 & 0 & 1 \end{pmatrix}.$$

## References

- [1] Pereira, M.: Generalized random fields on Riemannian manifolds : theory and practice. Theses, Université Paris sciences et lettres (November 2019). <https://pastel.hal.science/tel-02499376>
